# Supplementary material for: Bapineuzumab for mild to moderate Alzheimer’s disease in two global, randomized, phase 3 trials
Source: Springer Nature journal article supplement (doi:10.1186/s13195-016-0189-7), 2016-05-12
Supplement: MOESM5 [file 10111914]

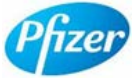

### **16.1.3 List of Independent Ethics Committees or Institutional Review Boards – Independent Ethics Committees**

A list of the following is included:

- [The List of Independent Ethics Committees, sorted by country and site, for sites that screened subjects.](#)

090177e184765be1\Approved\Approved On: 16-Aug-2013 07:04

**Independent Ethics Committees**

| <b>Site number</b> | <b>Name and Address of Committee</b>                                                                                                                                                         |
|--------------------|----------------------------------------------------------------------------------------------------------------------------------------------------------------------------------------------|
| <b>Argentina</b>   |                                                                                                                                                                                              |
| 169                | Comite de Etica de la Investigacion del CEMIC<br>Galvan 4102,<br>Buenos Aires C1431FWO                                                                                                       |
| 172                | Comite de Etica de Protocolos de Investigacion<br>(C.E.P.I.) Hospital Italiano,<br>Gascon 450 (C1181ACH),<br>Buenos Aires                                                                    |
| 173                | Comite de Etica Independiente en Investigacion<br>Clinica Larrea 1381- 3°A<br>Buenos Aires C1117ABK                                                                                          |
| 174                | Comité de Ética, Investigación y Docencia, Sanatorio<br>Prof. León S. Morra S.A Av. Sagrada Familia esq.<br>Nazaret,<br>Córdoba, Córdoba X5009BIN                                            |
| <b>Australia</b>   |                                                                                                                                                                                              |
| 52<br>56           | Northern Sydney / Central Coast Area Health Service<br>HREC Human Research Ethics Committee,<br>Royal North Shore Hospital,<br>Level 2 Building 51,<br>Pacific Hwy,<br>St Leonards, NSW 2065 |
| 53                 | Austin Health Human Research Ethics Committee<br>145 Studley Road<br>Heidelberg, Vic 3084                                                                                                    |
| 55                 | Hollywood Private Hospital Research Ethics<br>Committee 101 Monash Avenue,<br>Nedlands, WA 6009                                                                                              |

| <b>Site number</b> | <b>Name and Address of Committee</b>                                                                                                                                     |
|--------------------|--------------------------------------------------------------------------------------------------------------------------------------------------------------------------|
| <b>Australia</b>   |                                                                                                                                                                          |
| 57                 | Central Northern Adelaide Health Service Ethics of Human Research Committee (TQEH & LMH) The Queen Elizabeth Hospital,<br>28 Woodville Road,<br>Woodville South, SA 5011 |
| 58                 | Royal Adelaide Hospital Research Ethics Committee<br>Royal Adelaide Hospital,<br>Level 3, Hanson Centre,<br>North Terrace,<br>Adelaide, SA 5000                          |
| 267                | BHS & SJOG Human Research Ethics Committee<br>PO Box 577,<br>Drummond Street North,<br>Ballarat, VIC 3353                                                                |
| <b>Austria</b>     |                                                                                                                                                                          |
| 140                | Ethik Kommission der Medizinischen Universitaet<br>Wien und des Allgemeinen Krankenhauses der Stadt                                                                      |
| 141                | Wien/AKH,                                                                                                                                                                |
| 142                | Borschkegasse 8b/E 06,                                                                                                                                                   |
| 151                | (Dienstzimmergebaude, BT 68),<br>Wien A-1090                                                                                                                             |
| <b>Belgium</b>     |                                                                                                                                                                          |
| 46                 | Commissie Medische Ethiek<br>Toetsingscommissie,<br>Herestraat 49 3000 Leuven                                                                                            |
| 47                 | Commissie Medische Ethiek van de Universitaire<br>Ziekenhuizen KU Campus Gasthuisberg E330<br>Herestraat 49,<br>Leuven 3000                                              |
| 48                 |                                                                                                                                                                          |
| 49                 |                                                                                                                                                                          |
| 265                |                                                                                                                                                                          |
| 272                |                                                                                                                                                                          |

090177e184765be1\Approved\Approved On: 16-Aug-2013 07:04



---

| <b>Site number</b>         | <b>Name and Address of Committee</b>                                                                                         |
|----------------------------|------------------------------------------------------------------------------------------------------------------------------|
| <hr/> <b>Chile</b> <hr/>   |                                                                                                                              |
| 126<br>176                 | Comite Etico Cientifico, Servicio de Salud<br>Metropolitano Oriente Av. Salvador 364<br>Providencia,<br>Santiago, RM 7500922 |
| <hr/> <b>Croatia</b> <hr/> |                                                                                                                              |
| 248                        | Central Ethics Committee Agency for Medicinal<br>Products and Medical Devices<br>Ksaverska c. 4,<br>Zagreb 10000             |
| <hr/> <b>Finland</b> <hr/> |                                                                                                                              |
| 3<br>6                     | Pohjois-Savon sairaanhoitopiirin ky Tutkimuseettinen<br>toimikunta<br>Rakennus 10 (4. krs)<br>PL 1777,<br>Kuopio 70211       |

---

---

| <b>Site number</b> | <b>Name and Address of Committee</b>                                                                       |
|--------------------|------------------------------------------------------------------------------------------------------------|
| <b>France</b>      |                                                                                                            |
| 109                |                                                                                                            |
| 110                |                                                                                                            |
| 111                |                                                                                                            |
| 112                |                                                                                                            |
| 114                |                                                                                                            |
| 115                |                                                                                                            |
| 116                |                                                                                                            |
| 117                |                                                                                                            |
| 118                | CPP Ile de France 3 Hôpital Tarnier Cochin                                                                 |
| 119                | 89, rue d'Assas,                                                                                           |
| 120                | Paris 75006                                                                                                |
| 121                |                                                                                                            |
| 122                |                                                                                                            |
| 123                |                                                                                                            |
| 124                |                                                                                                            |
| 125                |                                                                                                            |
| 157                |                                                                                                            |
| 158                |                                                                                                            |
| 291                |                                                                                                            |
| <b>Germany</b>     |                                                                                                            |
| 97                 |                                                                                                            |
| 98                 | Ethik-Kommission der Fakultät fuer Medizin der                                                             |
| 101                | Technischen Universität München Ismaninger Str.                                                            |
| 103                | 22,                                                                                                        |
| 292                | München 81675                                                                                              |
| 315                |                                                                                                            |
| <b>Italy</b>       |                                                                                                            |
| 29                 | Comitato Etico Indipendente dell'IRCCS Fondazione<br>S. Lucia di Roma<br>Via Ardeatina, 306,<br>Roma 00179 |

---

| <b>Site number</b> | <b>Name and Address of Committee</b>                                                                                                                                                |
|--------------------|-------------------------------------------------------------------------------------------------------------------------------------------------------------------------------------|
| <b>Italy</b>       |                                                                                                                                                                                     |
| 33                 | Comitato Etico della Fondazione IRCCS Istituto Neurologico Carlo Besta di Milano<br>Via Celoria, 11,<br>Milano 20133                                                                |
| 34                 | Comitato Etico Comitato Etico dell'Azienda Ospedaliero Universitaria<br>Ospedali Riuniti Umberto I - G.M. Lancisi - G. Salesi di ancona<br>Via Conca, 71<br>Ancona 60126            |
| 37                 | Comitato Etico Locale per la Sperimentazione Clinica dei Medicinali dell'Azienda Ospedaliera Universitaria Senese di Siena<br>c/o UOC Farmacia AOUS<br>Viale Bracci,<br>Siena 53100 |
| 38                 | Comitato Etico dell'Universita' degli Studi Gabriele D'Annunzio e della ASL 2 Lanciano-Vasto-Chieti di Chieti<br>Via dei Vestini, 31,<br>Chieti 66100                               |
| 39                 | Comitato Etico Azienda Spedali Civili di Brescia<br>Piazzale Spedali Civili, 1<br>Brescia 25123                                                                                     |
| 40                 | Comitato Etico Dell'azienda Ospedaliera Cannizzaro Di Catania Via Messina, 829<br>Catania 95126                                                                                     |

| <b>Site number</b> | <b>Name and Address of Committee</b>                                                                                                      |
|--------------------|-------------------------------------------------------------------------------------------------------------------------------------------|
| <b>Italy</b>       |                                                                                                                                           |
| 41                 | Comitato Etico dell'Azienda Ospedaliero<br>Universitaria Policlinico Vittorio Emanuele di<br>Catania Via Santa Sofia, 78<br>Catania 95123 |
| 90                 | Comitato Etico Azienda Ospedaliera San Gerardo di<br>Monza Via Pergolesi, 33<br>Monza (MI) 20052                                          |
| 211                | Comitato Etico dell'Universita' Campus Bio-Medico<br>di Roma Via Alvaro del Portillo, 21<br>Roma 00128                                    |
| <b>Japan</b>       |                                                                                                                                           |
| 177                | National Hospital Organization Kokura Medical<br>Center 10-1 Harugaoka<br>Kokuraminami-ku<br>Kitakyusyu-shi,<br>Fukuoka 802-8533          |
| 178                | Yokohama City University Medical Center IRB 4-57<br>Urafunecho<br>Minami-ku,<br>Yokohama, Kanagawa 232-0024                               |
| 179                | National Hospital Organization Minami-Okayama<br>Medical Center IRB 4066<br>Hayashima, Hayashima-cho,<br>Tukubo-Gun, Okayama 701-0304     |

| Site number  | Name and Address of Committee                                                                                                                             |
|--------------|-----------------------------------------------------------------------------------------------------------------------------------------------------------|
| <b>Japan</b> |                                                                                                                                                           |
| 180<br>204   | Juntendo University Hospital IRB 3-1-3<br>Hongo<br>Bunkyo-ku,<br>Tokyo 113-8431                                                                           |
| 181          | National Hospital Organization Niigata National<br>Hospital IRB 3-52 Akasaka-cho<br>kashiwazaki,<br>Niigata 945-8585                                      |
| 182          | National Hospital Organization Chiba-East Hospital<br>673<br>Nitona-chou<br>Chuou-ku<br>Chiba,<br>Chiba 260-8712                                          |
| 183          | Kagawa University Hospital IRB 1750-1<br>Ikenobe<br>Miki-cho<br>Kita-gun,<br>Kagawa 761-0793                                                              |
| 184          | National Hospital Organization Shizuoka Institute of<br>Epilepsy and Neurological Disorders 886<br>Urushiyama<br>Aoi-ku<br>Shizuoka,<br>Shizuoka 420-8688 |
| 185          | Osaka City University Hospital 1-5-7,<br>Asahi-machi,<br>Abeno-ku,<br>Osaka,<br>Osaka 545-8586                                                            |
| 186          | Juntendo Tokyo Koto Geriatric Medical Center IRB<br>3-3-20<br>Shinsuna<br>Koto-ku,<br>Tokyo 136-0075                                                      |



| Site number  | Name and Address of Committee                                                                                       |
|--------------|---------------------------------------------------------------------------------------------------------------------|
| <b>Japan</b> |                                                                                                                     |
| 187          | Tokyo Medical University Hospital 6-7-1<br>Nishi-Shinjuku<br>Shinjuku-ku,<br>Tokyo 160-0023                         |
| 188          | Rakuwakai Otowa Hospital IRB 2 Chinji-cho,<br>Otowa,<br>Yamashina-ku<br>Kyoto-shi,<br>Kyoto 607-8062                |
| 189          | Okayama University Hospital IRB 2-5-1 Shikata-cho,<br>Kita-ku<br>Okayama,<br>Okayama 700-8558                       |
| 190          | National Hospital Organization Minami-Kyoto<br>Hospital IRB 11 Ashihara, Naka,<br>Jouyou-shi,<br>Kyoto 610-0113     |
| 191          | National Hospital Organization Hiroshima-nishi<br>Medical Center 4-1-1<br>Kuba<br>Otake city,<br>Hiroshima 739-0696 |
| 192          | National Hospital Organization Tokyo National<br>Hospital IRB 3-1-1 Takeoka,<br>Kiyose-shi,<br>Tokyo 204-8585       |
| 193          | National Hospital Organization Maizuru Medical<br>Center IRB 2410 Aza Yukinaga,<br>Maizuru,<br>Kyoto 625-8502       |
| 194          | Kansai Medical University Takii Hospital 10-15<br>Fujizono-cho<br>Moriguchi,<br>Osaka 570-8507                      |

| <b>Site number</b> | <b>Name and Address of Committee</b>                                                                                                            |
|--------------------|-------------------------------------------------------------------------------------------------------------------------------------------------|
| <b>Japan</b>       |                                                                                                                                                 |
| 195                | Gunma University Hospital 3-39-15<br>Showa-machi<br>Maebashi,<br>Gunma 371-8511                                                                 |
| 196                | Kobe University Hospital IRB 7-5-2<br>kusunoki-cho, Chuo-ku<br>Kobe,<br>Hyogo 650-0017                                                          |
| 197                | Nagoya City University Hospital IRB Nagoya City<br>University Hospital IRB<br>1<br>Kawasumi Mizuho-cho,<br>Mizuho-ku, Nagoya,<br>Aichi 467-8602 |
| 198                | Osaka University Hospital IRB Institutional Review<br>Board<br>2-15<br>Yamadaoka<br>Suita,<br>Osaka 565-0871                                    |
| 200                | Tokyo Medical University Hachioji Medical Center<br>1163<br>Tatemachi<br>Hachioji,<br>Tokyo 193-09440998                                        |
| 201                | Tokyo Metropolitan Health and Medical Treatment<br>Corporation Ebara Hospital 4-5-10 Higashi-Yukigaya<br>Ota-ku,<br>Tokyo 145-0065              |
| 202                | Nippon Medical School Chiba Hokusoh Hospital IRB<br>1715, Kamagari, Inzaishi<br>Chiba 270-1694                                                  |

| Site number  | Name and Address of Committee                                                                                          |
|--------------|------------------------------------------------------------------------------------------------------------------------|
| <b>Japan</b> |                                                                                                                        |
| 203          | Maebashi Red Cross Hospital IRB 3-21-36<br>Asahi Chou<br>Maebashi,<br>Gunma 371-0014                                   |
| 207          | Iwate Medical University Hospital IRB 19-1<br>Uchimaruru<br>Morioka-shi,<br>Iwate 020-8505                             |
| 208          | Yachiyo Hospital 2-2-7 Sumiyoshi-cho,<br>Anjo-city,<br>Aichi 446-8510                                                  |
| 274          | National Hospital Organization Matsumoto Medical<br>Center IRB 811, Kotobukitoyooka,<br>Matsumoto,<br>Nagano 399-0021  |
| 275          | Tokusyukai Group IRB 1-8-7<br>Kojimachi<br>Chiyoda-ku,<br>Tokyo 102-0083                                               |
| 276          | Nippon Medical School Musashi Kosugi Hospital<br>IRB 1-396, Kosugimachi, Nakaharaku,<br>kawasaki,<br>kanagawa 211-8533 |
| 277          | Shinozuka Hospital IRB 105-1 Shinozuka,<br>Fujioka-city,<br>Gunma 375-0017                                             |
| 281          | Kashiwado Hospital IRB 2-21-8 Nagazu, Chuo-ku,<br>Chiba-shi,<br>Chiba 260-86560854                                     |
| 308          | Himorogi Psychiatric Institute IRB 1-20-10<br>Sugamo<br>Toshima-ku,<br>Tokyo 170-0002                                  |

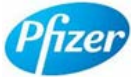

3133K1-3001 (B2521002)

| Site number        | Name and Address of Committee                                                                                                                                                           |
|--------------------|-----------------------------------------------------------------------------------------------------------------------------------------------------------------------------------------|
| <b>Japan</b>       |                                                                                                                                                                                         |
| 309                | Kobe City Medical Center West Hospital 2-4<br>Ichiban-cho, Ngata-ku,<br>kobe city,<br>Hyogo 653-0013                                                                                    |
| <b>Mexico</b>      |                                                                                                                                                                                         |
| 154                | Comite de Etica, Investigacion y Bioseguridad<br>Privada de Aguascalientes,<br>SC Sierra Fria 218<br>Fraccionamiento Bosques del Prado Norte<br>Aguascalientes,<br>Aguascalientes 20127 |
| 283                | Comite de Ética e Investigación del Hospital y<br>Clínica OCA ,<br>S.A. de C.V Pino Suarez 645 Nte<br>Monterrey,<br>Nuevo Leon 64000                                                    |
| <b>Netherlands</b> |                                                                                                                                                                                         |
| 70                 |                                                                                                                                                                                         |
| 72                 |                                                                                                                                                                                         |
| 73                 |                                                                                                                                                                                         |
| 76                 | Vrije Universiteit Medisch Centrum Medisch<br>Ethische Toetsingscommissie                                                                                                               |
| 77                 | Postbus 7057                                                                                                                                                                            |
| 80                 | Amsterdam, NH 1007 MB                                                                                                                                                                   |
| 81                 |                                                                                                                                                                                         |
| 160                |                                                                                                                                                                                         |
| 285                |                                                                                                                                                                                         |
| 226                | Front Office Vumc (Vumc Ethics Committee) Bureau<br>Medische Zaken<br>Polikliniekgebouw 6Z 196 VU Medisch Centrum -<br>Postbus 7057<br>Amsterdam 1007 MB                                |

090177e184765be1\Approved\Approved On: 16-Aug-2013 07:04

| <b>Site number</b>              | <b>Name and Address of Committee</b>                                                                                              |
|---------------------------------|-----------------------------------------------------------------------------------------------------------------------------------|
| <b>New Zealand</b>              |                                                                                                                                   |
| 54<br>107                       | Multi Region Ethics Committee Ministry of Health<br>PO Box 5013<br>No. 1 The Terrace,<br>Wellington 6145                          |
| <b>Poland</b>                   |                                                                                                                                   |
| 143<br>146<br>147<br>150<br>282 | Komisja Bioetyczna przy Warszawskim<br>Uniwersytecie Medycznym w Warszawie ul. Zwirki i<br>Wigury 61,<br>Warszawa 02-091          |
| <b>Portugal</b>                 |                                                                                                                                   |
| 161<br>162<br>163               | Comissao de Etica Para a Investigacao Clinica<br>Parque Da Saude De Lisboa.<br>Av. Do Brasil,<br>53 PAV. 17-A,<br>LISBOA 1749-004 |
| <b>Serbia</b>                   |                                                                                                                                   |
| 42                              | Ethics Committee of CCS Pasterova 2,<br>Belgrade 11000                                                                            |
| 44                              | Ethics Committee of CC Kragujevac Zmaj Jovina 32,<br>Kragujevac 34000                                                             |
| 266                             | Ethics Committe Clinical Centre of Vojvodina<br>Hajduk Veljkova 1-9,<br>Novi Sad 21000                                            |

| <b>Site number</b>  | <b>Name and Address of Committee</b>                                                                                    |
|---------------------|-------------------------------------------------------------------------------------------------------------------------|
| <b>Slovakia</b>     |                                                                                                                         |
| 135                 | Eticka komisia Vseobecnej nemocnice Rimavska                                                                            |
| 136                 | Sobota Eticka komisia Vseobecnej nemocnice                                                                              |
| 137                 | Rimavska Sobota                                                                                                         |
| 138                 | Srobarova 1,<br>Rimavska Sobota 979 12                                                                                  |
| <b>Slovakia</b>     |                                                                                                                         |
| 136                 | Eticka komisia UN Bratislava Eticka komisia UN<br>Bratislava<br>Nemocnica Ruzinov<br>Ruzinovska 6,<br>Bratislava 826 06 |
| 137                 | Eticka komisia Psychiatricka nemocnica Michalovce,<br>n.o.<br>Stranany,<br>Michalovce 071 01                            |
| 138                 | Eticka komisia Bratislavského samosprávneho kraja<br>Sabinovska 16<br>P.O.Box 106,<br>Bratislava 820 05                 |
| <b>South Africa</b> |                                                                                                                         |
| 83                  |                                                                                                                         |
| 84                  |                                                                                                                         |
| 86                  | Pharma Ethics 123 Amcor Road                                                                                            |
| 87                  | Lyttelton Manor,                                                                                                        |
| 88                  | Centurion 0157                                                                                                          |
| 89                  |                                                                                                                         |

| Site number  | Name and Address of Committee                                                                                                                                                                                                                                                   |
|--------------|---------------------------------------------------------------------------------------------------------------------------------------------------------------------------------------------------------------------------------------------------------------------------------|
| <b>Spain</b> |                                                                                                                                                                                                                                                                                 |
| 14           | Comite Etico de Ensayos Clinicos Agencia de Ensayos Clínicos<br>Hospital Clinic de Barcelona<br>Servicio de Farmacia<br>C/ Villarroel,<br>170 Esc 6B sótano<br>08036 Barcelona                                                                                                  |
| 15           | Comite Etico De Investigacion Clinica<br>Parc de Salut MAR Comité Ético de Investigación Clínica Parc de Salut MAR<br>Consorci Mar Parc de Salut de Barcelona<br>Parc de Recerca Biomèdica de Barcelona (dcho. 163.03),<br>C/ Doctor Aiguader, 88, 1ª planta<br>08003 Barcelona |
| 16           | Hospital de la Santa Creu i Sant Pau Comité Ético de Investigación Clínica<br>Hospital de la Santa Creu i Sant Pau<br>Servicio de Farmacología Clínica<br>Edificio HC,<br>planta 1ª - izquierda.<br>Av. Sant Antoni Mª Claret, 167<br>08025 Barcelona                           |
| 18           | Hospital Mutua de Terrassa Comité Ético de Investigación Clínica<br>Hospital Mutua de Terrassa<br>Servicio de Farmacia<br>Plaça Dr. Robert, 5, Sótano -1<br>08221 Terrassa - Barcelona                                                                                          |
| 19           | Hospital Universitario La Paz Secretaría Técnica del Comité Ético de Investigación Clínica - Área 5<br>Hospital Universitario La Paz<br>Edificio Hospital General<br>Pº de la Castellana,<br>261 Plta. 8ª Despacho 818 - 819<br>28046 Madrid                                    |

| <b>Site number</b> | <b>Name and Address of Committee</b>                                                                                                                                                                                                                                                                                                         |
|--------------------|----------------------------------------------------------------------------------------------------------------------------------------------------------------------------------------------------------------------------------------------------------------------------------------------------------------------------------------------|
| <b>Spain</b>       |                                                                                                                                                                                                                                                                                                                                              |
| 20                 | Ceic De Burgos Y Soria Comité Ético de Investigación Clínica<br>Complejo Asistencial Universitario de Burgos<br>Hospital Universitario de Burgos<br>Unidad de Investigación<br>Avda. del Cid, 96<br>09005 Burgos                                                                                                                             |
| 21                 | Comite Etico de Investigacion Clinica Comité Ético de Investigación Clínica<br>Area de Gestion de Proyectos - Unidad Administrativa<br>Hospital Universitario 12 de Octubre<br>Instituto de Investigación Hospital 12 de Octubre (i+12)<br>Centro de Actividades Ambulatorias, 6ª Planta - Bloque D<br>Avda. de Córdoba, s/n<br>28041 Madrid |
| 22                 | Comite Etico de Investigacion Clinica de Euskadi<br>Comité Ético de Investigación Clínica<br>Hospital de Cruces<br>Unidad de Epidemiología Clínica<br>Pabellón de Investigación<br>(detrás del Pabellón de Administración)<br>Plaza de Cruces, 12<br>48903 Baracaldo - Vizcaya                                                               |



| <b>Site number</b> | <b>Name and Address of Committee</b>                                                                                                                                                                                                               |
|--------------------|----------------------------------------------------------------------------------------------------------------------------------------------------------------------------------------------------------------------------------------------------|
| <b>Spain</b>       |                                                                                                                                                                                                                                                    |
| 23                 | Comité Ético de Investigación Clínica - Área 7<br>Hospital Clínico San Carlos<br>Servicio de Farmacología Clínica<br>Unidad de Coordinación de Ensayos Clínicos<br>1ª planta, Ala norte,<br>puerta G<br>C/ Prof. Martín Lagos, s/n<br>28040 Madrid |
| 24                 | Comité Ético de Investigación Clínica - Área 2<br>Hospital Universitario de La Princesa<br>C/ Diego de León, 62<br>28006 Madrid                                                                                                                    |
| 25                 | Comité Ético de Investigación Clínica<br>Hospital General Universitario de Elche<br>Edificio de Salud Mental 3ª planta<br>C/ Camí de L'Almazara, 11<br>03203 Elche – Alicante                                                                      |
| 26                 | Comité Ético de Investigación Clínica<br>Hospital Universitario Virgen de la Arrixaca<br>Planta 0 de Policlínico<br>Ctra. de Madrid - Cartagena, s/n<br>30120 El Palmar - Murcia                                                                   |
| 51                 | Complejo Hospitalario de Cáceres Comité Ético de<br>Investigación Clínica de Cáceres<br>Hospital Ntra. Sra. de la Montaña<br>Avda. de España, 2<br>10004 Cáceres                                                                                   |

| Site number        | Name and Address of Committee                                                                                                                                                                                                                                    |
|--------------------|------------------------------------------------------------------------------------------------------------------------------------------------------------------------------------------------------------------------------------------------------------------|
| <b>Spain</b>       |                                                                                                                                                                                                                                                                  |
| 212                | Hospital Universitario Ramon y Cajal Comité Ético de Investigación Clínica - Área 4<br>Hospital Universitario Ramón y Cajal<br>Planta menos 2 - dcha.<br>Ctra. de Colmenar Viejo,<br>Km. 9,100<br>28034 Madrid                                                   |
| 213                | Comite Etico De Investigacion Clinica De Euskadi, CEI-E Comité Ético de Investigación Clínica de la Comunidad Autónoma del País Vasco.<br>CEIC-E<br>Dirección de Farmacia del Departamento de Sanidad<br>C/ Donostia - San Sebastián, 1<br>01010 Vitoria - Alava |
| 214                | Comite Etico de Investigacion Clinica de Las Islas Baleares Comité Etico de Investigación Clinica de las Islas Baleares (CEIC-IB)<br>Consellería de Salut I Consum<br>Camino de Jesús, 38<br>07011 Palma de Mallorca - Baleares                                  |
| <b>Sweden</b>      |                                                                                                                                                                                                                                                                  |
| 4<br>215           | Regionala etikprovningssamfundet i Stockholm FE<br>289<br>Stockholm 171 77                                                                                                                                                                                       |
| <b>Switzerland</b> |                                                                                                                                                                                                                                                                  |
| 127                | Ethikkommission beider Basel EKBB Hebelstrasse<br>53<br>Basel CH-4056                                                                                                                                                                                            |
| 128                | University Hospital Geneva Ethic Committee of Internal Medicine<br>Geneva 1211                                                                                                                                                                                   |

---

| <b>Site number</b>    | <b>Name and Address of Committee</b>                                                                                                                                                                                               |
|-----------------------|------------------------------------------------------------------------------------------------------------------------------------------------------------------------------------------------------------------------------------|
| <b>Switzerland</b>    |                                                                                                                                                                                                                                    |
| 164                   | Centre Hospitalier Universitaire Vaudois Commission<br>d'ethique de la Recherche Clinique<br>Rue du Bugnon 21<br>Lausanne 1011                                                                                                     |
| <b>United Kingdom</b> |                                                                                                                                                                                                                                    |
|                       | NRES Committee London ζ South East Room<br>4W/10, 4th Floor West,<br>Charing Cross Hospital,<br>Fulham Palace Road,<br>London, W6 8RF                                                                                              |
| 60                    | Sheffield Health and Social Care NHS Research<br>Development Unit,<br>Fulwood House,<br>Old Fulwood Road,<br>Sheffield S10 3TH                                                                                                     |
|                       | STH NHS Foundation Trust Research Department 1st<br>Floor,<br>11 Broomfield Road,<br>Sheffield S10 2SE                                                                                                                             |
|                       | NRES Committee London ζ South East Room<br>4W/10, 4th Floor West,<br>Charing Cross Hospital,<br>Fulham Palace Road,<br>London, W6 8RF                                                                                              |
| 61                    | Cardiff and Vale University Health Board University<br>Hospital of Wales,<br>Commercial Clinical Trials,<br>Research & Development Office,<br>Second Floor, Tower Block 2,<br>Room 3 (2TB2 R3),<br>Heath Park,<br>Cardiff CF14 4XW |

---

| <b>Site number</b>    | <b>Name and Address of Committee</b>                                                                                                                                                                                                    |
|-----------------------|-----------------------------------------------------------------------------------------------------------------------------------------------------------------------------------------------------------------------------------------|
| <b>United Kingdom</b> |                                                                                                                                                                                                                                         |
| 62<br>67<br>68<br>206 | NRES Committee London ç South East Room<br>4W/10, 4th Floor West,<br>Charing Cross Hospital,<br>Fulham Palace Road,<br>London, W6 8RF                                                                                                   |
| 65                    | Avon and Wiltshire Mental Health Partnership NHS<br>Trust Research and Development,<br>The Blackberry Centre,<br>Blackberry Hill Hospital,<br>Manor Road, Fishponds,<br>Bristol BS16 2EW                                                |
|                       | NRES Committee London,<br>South East Health Research Authority,<br>Ground Floor, Skipton House<br>80 London Road<br>London SE1 6LH                                                                                                      |
| 66                    | NHS Greater Glasgow and Community Primary Care,<br>Community & Mental Health LREC South Glasgow<br>& Clyde REC,<br>R&D Directorate,<br>1st Floor - The Tennent Institute,<br>Western Infirmary,<br>38 Church Street,<br>Glasgow G11 6NT |
|                       | NRES Committee London ç South East Room<br>4W/10, 4th Floor West,<br>Charing Cross Hospital,<br>Fulham Palace Road,<br>London, W6 8RF                                                                                                   |

| <b>Site number</b>    | <b>Name and Address of Committee</b>                                                                                                                                                                       |
|-----------------------|------------------------------------------------------------------------------------------------------------------------------------------------------------------------------------------------------------|
| <b>United Kingdom</b> |                                                                                                                                                                                                            |
| 108                   | Salford and Trafford Local Research Ethics Committee Room 181,1st Floor, Gateway House, Piccadilly South, Manchester M60 7LP                                                                               |
|                       | NRES Committee London ç South East Room 4W/10, 4th Floor West, Charing Cross Hospital, Fulham Palace Road, London, W6 8RF                                                                                  |
| 159                   | Kings Health Partners Joint Clinical Trials Office, Floor 16, Tower Wing, Guy's Hospital, Great Maze Pond, London SE1 9RT                                                                                  |
|                       | NRES Committee London ç South East Room 4W/10, 4th Floor West, Charing Cross Hospital, Fulham Palace Road, London, W6 8RF                                                                                  |
| 166                   | Imperial College London and Imperial College Healthcare NHS Trust AHSC Joint Research Office, Room GM14, St.Mary 's Hospital, Faculty of Medicine Ground Mezzanine Floor, Praed Street Wing, London W2 1PG |
|                       | NRES Committee London ç South East Room 4W/10, 4th Floor West, Charing Cross Hospital, Fulham Palace Road, London, W6 8RF                                                                                  |

---

| <b>Site number</b>    | <b>Name and Address of Committee</b>                                                                                                                  |
|-----------------------|-------------------------------------------------------------------------------------------------------------------------------------------------------|
| <b>United Kingdom</b> |                                                                                                                                                       |
|                       | Northumberland, Tyne and Wear NHS Trust<br>Research Department,<br>St Nicholas Hospital,<br>Jubilee Road,<br>Gosforth,<br>Newcastle upon Tyne NE3 3XT |
| 168                   | NRES Committee London ç South East Room<br>4W/10, 4th Floor West,<br>Charing Cross Hospital,<br>Fulham Palace Road,<br>London, W6 8RF                 |
|                       | The Newcastle upon Tyne Hospitals NHS Foundation<br>Trust Royal Victoria Infirmary,<br>Queen Victoria Road,<br>Newcastle upon Tyne NE1 4LP            |
|                       | Northampton General Hospital NHS Trust Research<br>& Development Centre,<br>Cliftonville,<br>Northampton NN1 5BD                                      |
| 175                   | NRES Committee London ç South East Room<br>4W/10, 4th Floor West,<br>Charing Cross Hospital,<br>Fulham Palace Road,<br>London, W6 8RF                 |

---



---

| <b>Site number</b>   | <b>Name and Address of Committee</b>             |
|----------------------|--------------------------------------------------|
| <b>United States</b> |                                                  |
| 216                  |                                                  |
| 217                  |                                                  |
| 218                  |                                                  |
| 219                  |                                                  |
| 220                  |                                                  |
| 221                  |                                                  |
| 222                  |                                                  |
| 223                  |                                                  |
| 224                  |                                                  |
| 227                  |                                                  |
| 228                  |                                                  |
| 229                  |                                                  |
| 230                  |                                                  |
| 232                  |                                                  |
| 233                  |                                                  |
| 235                  |                                                  |
| 236                  |                                                  |
| 237                  |                                                  |
| 238                  |                                                  |
| 239                  |                                                  |
| 241                  | Western Institutional Review Board 3535 7th Ave. |
| 242                  | SW,                                              |
| 243                  | Olympia, WA 98502                                |
| 247                  |                                                  |
| 249                  |                                                  |
| 250                  |                                                  |
| 251                  |                                                  |
| 252                  |                                                  |
| 253                  |                                                  |
| 254                  |                                                  |
| 255                  |                                                  |
| 256                  |                                                  |
| 258                  |                                                  |
| 260                  |                                                  |
| 279                  |                                                  |
| 280                  |                                                  |
| 286                  |                                                  |
| 289                  |                                                  |
| 307                  |                                                  |

---

090177e184765be1\Approved\Approved On: 16-Aug-2013 07:04



| <b>Site number</b>   | <b>Name and Address of Committee</b>                                                                                                        |
|----------------------|---------------------------------------------------------------------------------------------------------------------------------------------|
| <b>United States</b> |                                                                                                                                             |
| 225                  | University of Kansas Medical Center Human Subjects Committee,<br>3901 Rainbow Boulevard,<br>Kansas City, KS 66160                           |
| 240                  | Springfield Committee for Research Involving Human Subjects P.O. Box 19616<br>801 North Rutledge Street,<br>Springfield, IL 62702           |
| 244                  | Greenwich Hospital Institutional Review Board 5<br>Perryridge Road,<br>Greenwich, CT 06830                                                  |
| 245                  | Abington Memorial Hospital Institutional Review Board,<br>1200 Old York Road,<br>Abington, PA 19001-3788                                    |
| 246                  | Providence Health & Services Institutional Review Board,<br>Building A,<br>5251 NE Glisan Street,<br>3rd Floor,<br>Portland, OR 97213       |
| 259                  | Human Investigation Committee 55 College Street<br>New Haven, CT 06510                                                                      |
| 261                  | Michigan State<br>University Biomedical and Health IRB,<br>207 Olds Hall,<br>East Lansing, MI 48824                                         |
| 262                  | University of Michigan Medical School Institutional Review Board,<br>Building 200 - Room 2086<br>2800 Plymouth Road,<br>Ann Arbor, MI 48109 |





---

| <b>Site number</b>   | <b>Name and Address of Committee</b>                                                                                                                                |
|----------------------|---------------------------------------------------------------------------------------------------------------------------------------------------------------------|
| <b>United States</b> |                                                                                                                                                                     |
| 263                  | Thomas Jefferson University Office of Scientific Affairs,<br>Division of Human Subjects Protection<br>Suite 1100<br>1015 Chestnut Street,<br>Philadelphia, PA 19107 |
| 264                  | Medical University of South Carolina Office of Research Integrity,<br>19 Hagood Avenue, Suite 601<br>MSC857<br>Charleston, SC 29425                                 |
| 268                  | University of Pennsylvania 19<br>Hagood Avenue,<br>Suite 601                                                                                                        |
| 269                  | Western Institutional Review Board<br>MSC857                                                                                                                        |
| 271                  | Butler Hospital IRB Charleston,<br>SC 29425                                                                                                                         |
| 355                  | Partners Research Committee Suite 1002<br>116 Huntington Avenue,<br>Boston, MA 02116                                                                                |

---

090177e184765be1\Approved\Approved On: 16-Aug-2013 07:04
