# Supplementary material for: Bapineuzumab for mild to moderate Alzheimer’s disease in two global, randomized, phase 3 trials
Source: Springer Nature journal article supplement (doi:10.1186/s13195-016-0189-7), 2016-05-12
Supplement: MOESM6 [file 10111914]

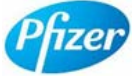

### **16.1.3 List of Independent Ethics Committees or Institutional Review Boards**

A list of the following is included:

- The List of Independent Ethics Committees, sorted by country and site, for sites that screened subjects.

090177e184835a0b\Approved\Approved On: 07-Sep-2013 01:35

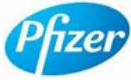**Independent Ethics Committees**

| <b>Site Number</b> | <b>Name and Address of Committee</b>                                                                                                                                                      |
|--------------------|-------------------------------------------------------------------------------------------------------------------------------------------------------------------------------------------|
| <b>Argentina</b>   |                                                                                                                                                                                           |
| 169                | Comite de Etica de la Investigacion del CEMIC<br>Galvan 4102<br>Buenos Aires C1431FWO                                                                                                     |
| 173                | Comite de Etica de Protocolos de Investigacion (C.E.P.I.)<br>Hospital Italiano<br>Gascon 450 (C1181ACH)<br>Buenos Aires                                                                   |
| <b>Australia</b>   |                                                                                                                                                                                           |
|                    | The Queen Elizabeth Hospital Clinical Pharmacology<br>Laboratory<br>28 Woodville Road<br>Woodville, SA 5011                                                                               |
|                    | Northern Sydney / Central Coast Area Health Service HREC<br>Human Research Ethics Committee, Royal North Shore<br>Hospital<br>Pacific Hwy, St Leonards, NSW 2065                          |
| 52                 | Human Research Ethics Committee<br>The Queen Elizabeth Hospital<br>28 Woodville Road<br>Woodville South<br>South Australia 5011                                                           |
|                    | Northern Sydney / Central Coast Area Health Service HREC<br>Human Research Ethics Committee, Royal North Shore<br>Hospital<br>Level 2 Building 51<br>Pacific Hwy<br>St Leonards, NSW 2065 |



3133K1-3000-WW/US (B2521001)

| Site Number      | Name and Address of Committee                                                                                                                                                |
|------------------|------------------------------------------------------------------------------------------------------------------------------------------------------------------------------|
| <b>Australia</b> |                                                                                                                                                                              |
| 53               | Austin Health Human Research Ethics Committee<br>145 Studley Road<br>Heidelberg, Vic 3084                                                                                    |
| 55               | Hollywood Private Hospital Research Ethics Committee<br>Monash Avenue,<br>Nedlands, WA 6009                                                                                  |
| 56               | Northern Sydney / Central Coast Area Health Service HREC<br>Human Research Ethics Committee, Royal North Shore<br>Hospital<br>Pacific Hwy<br>St Leonards, NSW 2065           |
| 57               | Central Northern Adelaide Health Service Ethics of Human<br>Research Committee (TQEH & LMH)<br>The Queen Elizabeth Hospital<br>28 Woodville Road<br>Woodville South, SA 5011 |
| 58               | Royal Adelaide Hospital Research Ethics Committee<br>Royal Adelaide Hospital<br>Level 3, Hanson Centre<br>North Terrace<br>Adelaide, SA 5000                                 |
| 267              | BHS & SJOG Human Research Ethics Committee<br>PO Box 577<br>Drummond Street North Ballarat, VIC 3353                                                                         |

090177e184835a0b\Approved\Approved On: 07-Sep-2013 01:35

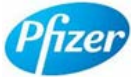

3133K1-3000-WW/US (B2521001)

| Site Number    | Name and Address of Committee                                                                                                |
|----------------|------------------------------------------------------------------------------------------------------------------------------|
| <b>Belgium</b> |                                                                                                                              |
| 46             |                                                                                                                              |
| 47             | Commissie Medische Ethiek van de Universitaire Ziekenhuizen KU                                                               |
| 48             | Campus Gasthuisberg E330                                                                                                     |
| 49             | Herestraat 49                                                                                                                |
| 265            | Leuven 3000                                                                                                                  |
| 272            |                                                                                                                              |
| <b>Canada</b>  |                                                                                                                              |
|                | Sunnybrook Research Ethics Board                                                                                             |
| 293            | Research Ethics Office<br>2075 Bayview Avenue<br>Toronto, ON M4N 3M5                                                         |
| <b>Canada</b>  |                                                                                                                              |
| 295            |                                                                                                                              |
| 296            | IRB Services                                                                                                                 |
| 321            | Suite 300                                                                                                                    |
| 329            | 372 Hollandview Trail                                                                                                        |
| 373            | Aurora, ON L4G 0A5                                                                                                           |
| 328            | Bruyere Continuing Care Research Ethics Board<br>43 Bruyere Street<br>Ottawa, ON K1N 5C8                                     |
| 330            | Comite D'Ethique de la Recherche de l'Hopital Maisonneuve-Rosemont<br>5415 Boulevard De l'Assomption<br>Montreal, QC H1T 2M4 |

090177e184835a0b\Approved\Approved On: 07-Sep-2013 01:35

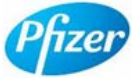

3133K1-3000-WW/US (B2521001)

| Site Number    | Name and Address of Committee                                                 |
|----------------|-------------------------------------------------------------------------------|
| <b>Chile</b>   |                                                                               |
| 126            | Comite Etico Cientifico, Servicio de Salud Metropolitano Oriente              |
| 176            | Av. Salvador 364<br>Providencia Santiago, RM 7500922                          |
| <b>Croatia</b> |                                                                               |
| 43             | Central Ethics Committee<br>Agency for Medicinal Products and Medical Devices |
| 248            | Ksaverska c. 4<br>Zagreb 10000                                                |
| <b>Finland</b> |                                                                               |
| 3              | Pohjois-Savon sairaanhoitopiirin ky<br>Tutkimuseettinen toimikunta            |
| 6              | Rakennus 10 (4. krs)<br>PL 1777Kuopio 70211                                   |

090177e184835a0b\Approved\Approved On: 07-Sep-2013 01:35



3133K1-3000-WW/US (B2521001)

| Site Number    | Name and Address of Committee                  |
|----------------|------------------------------------------------|
| <b>France</b>  |                                                |
| 109            |                                                |
| 110            |                                                |
| 111            |                                                |
| 112            |                                                |
| 113            |                                                |
| 114            |                                                |
| 115            |                                                |
| 117            |                                                |
| 118            | CPP Ile de France 3                            |
| 119            | Hôpital TARNIER                                |
| 120            | 89, rue dAssas                                 |
| 121            | PARIS 75006                                    |
| 122            |                                                |
| 123            |                                                |
| 124            |                                                |
| 125            |                                                |
| 157            |                                                |
| 158            |                                                |
| 291            |                                                |
| <b>Germany</b> |                                                |
| 96             | Ethik-Kommission der Fakultät fuer Medizin der |
| 101            | Technischen Universität München                |
| 292            | Ismaninger Str. 22                             |
| 315            | München 81675                                  |

090177e184835a0b\Approved\Approved On: 07-Sep-2013 01:35

| Site Number  | Name and Address of Committee                                                                                                                                                            |
|--------------|------------------------------------------------------------------------------------------------------------------------------------------------------------------------------------------|
| <b>Italy</b> |                                                                                                                                                                                          |
| 29           | Comitato Etico Indipendente<br>dell'IRCCS Fondazione S. Lucia di Roma<br>Via Ardeatina, 306, Roma 00179                                                                                  |
| 31           | Comitato Etico dell'IRCCS Fondazione San Raffaele del<br>Monte Tabor di Milano<br>Via Olgettina, 60 Milano 20132                                                                         |
| 33           | Comitato Etico<br>della Fondazione IRCCS Istituto Neurologico Carlo Besta di<br>Milano<br>Via Celoria, 11 Milano 20133                                                                   |
| 34           | Comitato Etico dell'Azienda Ospedaliero Universitaria<br>Ospedali Riuniti Umberto I - G.M. Lancisi - G. Salesi di<br>ancona<br>Via Conca, 71<br>Ancona 60126                             |
| 36           | Comitato Etico per la Sperimentazione Clinica dei Medicinali<br>dell'Azienda Ospedaliero-Universitaria Careggi di Firenze<br>C.T.O.<br>Largo Palagi, 1<br>Firenze 50139                  |
| 37           | Comitato Etico Locale per la Sperimentazione Clinica dei<br>Medicinali<br>dell'Azienda Ospedaliera Universitaria Senese di Siena<br>c/o UOC Farmacia AOUS<br>Viale Bracci<br>Siena 53100 |



| Site Number  | Name and Address of Committee                                                                                                                           |
|--------------|---------------------------------------------------------------------------------------------------------------------------------------------------------|
| <b>Italy</b> |                                                                                                                                                         |
| 38           | Comitato Etico dell'Universita' degli Studi Gabriele D'Annunzio<br>e della ASL 2 Lanciano-Vasto-Chieti di Chieti<br>Via dei Vestini, 31<br>Chieti 66100 |
| 39           | Comitato Etico Azienda Ospedaliera-Spedali Civili di Brescia<br>P.le Spedali Civili 1<br>Brescia 25123                                                  |
| 40           | Comitato Etico Dell'azienda Ospedaliera Cannizzaro Di Catania<br>Via messina, 829<br>Catania 95126                                                      |
| 90           | Comitato Etico Azienda Ospedaliera San Gerardo di Monza<br>Via Pergolesi, 33<br>Monza (MI) 20052                                                        |
| 211          | Comitato Etico dell'Universita' Campus Bio-Medico di Roma<br>Via Alvaro del Portillo, 21<br>Roma 00128                                                  |
| <b>Japan</b> |                                                                                                                                                         |
| 177          | National Hospital Organization Kokura Medical Center<br>10-1 Harugaoka Kokuraminami-ku<br>Kitakyusyu-shiFukuoka 802-8533                                |
| 178          | Yokohama City University Medical Center IRB<br>4-57 Urafunecho Minami-kuYokohama, Kanagawa 232-0024                                                     |





3133K1-3000-WW/US (B2521001)

| Site Number  | Name and Address of Committee                                                                                                                |
|--------------|----------------------------------------------------------------------------------------------------------------------------------------------|
| <b>Japan</b> |                                                                                                                                              |
| 179          | National Hospital Organization Minami-Okayama Medical Center IRB<br>4066 Hayashima, Hayashima-cho, Tsukubo-gun<br>Okayama 701-0304           |
| 180          | Juntendo University Hospital IRB<br>3-1-3 HongoBunkyo-ku, Tokyo 113-8431                                                                     |
| 181          | National Hospital Organization Niigata National Hospital IRB<br>3-52 Akasaka-cho kashiwazaki, Niigata 945-8585                               |
| 182          | National Hospital Organization Chiba-East Hospital<br>673 Nitona-chou Chuou-kuChiba, Chiba 260-8712                                          |
| 183          | Kagawa University Hospital IRB<br>1750-1 Ikenobe Miki-choKita-gun, Kagawa 761-0793                                                           |
| 184          | National Hospital Organization Shizuoka Institute of Epilepsy and Neurological Disorders<br>886 Urushiyama Aoi-kuShizuoka, Shizuoka 420-8688 |
| 185          | Osaka City University Hospital<br>1-5-7, Asahi-machi, Abeno-ku,Osaka, Osaka, 545-8586                                                        |
| 186          | Juntendo Tokyo Koto Geriatric Medical Center IRB<br>3-3-20, Shinsuna<br>Koto-ku, Tokyo 136-0075                                              |
| 187          | Tokyo Medical University Hospital<br>6-7-1 Nishi-ShinjukuShinjuku-ku, Tokyo 160-0023                                                         |
| 188          | Rakuwakai Otowa Hospital IRB<br>2 Chinji-cho, Otowa,<br>Yamashina-kuKyoto-shi, Kyoto 607-8062                                                |

090177e184835a0b\Approved\Approved On: 07-Sep-2013 01:35



3133K1-3000-WW/US (B2521001)

| Site Number  | Name and Address of Committee                                                                             |
|--------------|-----------------------------------------------------------------------------------------------------------|
| <b>Japan</b> |                                                                                                           |
| 189          | Okayama University Hospital IRB<br>2-5-1 Shikata-cho, Kita-ku Okayama, Okayama 700-8558                   |
| 190          | National Hospital Organization Minami-Kyoto Hospital IRB<br>11 Ashihara, Naka, Jouyou-shi, Kyoto 610-0113 |
| 191          | National Hospital Organization Hiroshima-nishi Medical Center<br>4-1-1 KubaOtake city, Hiroshima 739-0696 |
| 192          | National Hospital Organization Tokyo National Hospital IRB<br>3-1-1 Takeoka, Kiyose-shi, Tokyo 204-8585   |
| 193          | National Hospital Organization Maizuru Medical Center IRB<br>2410 Aza Yukinaga, Maizuru, Kyoto 625-8502   |
| 194          | Kansai Medical University Takii Hospital<br>10-15 Fujizono-cho Moriguchi, Osaka 570-8507                  |
| 195          | Gunma University Hospital<br>3-39-15 Showa-machiMaebashi, Gunma 371-8511                                  |
| 196          | Kobe University Hospital IRB<br>7-5-2 kusunoki-cho, Chuo-kuKobe, Hyogo 650-0017                           |
| 197          | Nagoya City University Hospital IRB<br>1 Kawasumi Mizuho-cho, Mizuho-ku,<br>Nagoya, Aichi, 467-8602       |
| 198          | Osaka University Hospital IRB<br>Institutional Review Board<br>2-15 YamadaokaSuita, Osaka 565-0871        |
| 200          | Tokyo Medical University Hachioji Medical Center<br>1163 TatemachiHachioji, Tokyo 193-0944                |

090177e184835a0b\Approved\Approved On: 07-Sep-2013 01:35



3133K1-3000-WW/US (B2521001)

| Site Number  | Name and Address of Committee                                                                                               |
|--------------|-----------------------------------------------------------------------------------------------------------------------------|
| <b>Japan</b> |                                                                                                                             |
| 201          | Tokyo Metropolitan Health and Medical Treatment Corporation Ebara Hospital<br>4-5-10 Higashi-YukigayaOta-ku, Tokyo 145-0065 |
| 202          | Nippon Medical School Chiba Hokusoh Hospital IRB<br>1715, Kamagari, Inzaishi Chiba 270-1694                                 |
| 203          | Maebashi Red Cross Hospital IRB<br>3-21-36 ASAHI CHOUMAEBASHI, GUNMA 371-0014                                               |
| 204          | Juntendo University Hospital IRB<br>3-1-3 HongoBunkyo-ku, Tokyo 113-8431                                                    |
| 207          | Iwate Medical University Hospital IRB<br>19-1 UchimaruMorioka-shi, Iwate 020-8505                                           |
| 208          | Yachiyo Hospital<br>2-2-7 Sumiyoshi-cho, Anjo-city, Aichi 446-8510                                                          |
| 274          | National Hospital Organization Matsumoto Medical Center IRB<br>811, Kotobukitoyooka, Matsumoto, Nagano 399-0021             |
| 275          | Tokusyukai Group IRB<br>1-8-7 KojimachiChiyoda-ku, Tokyo 102-0083                                                           |
| 276          | Nippon Medical School Musashi Kosugi Hospital IRB<br>1-396, Kosugimachi, Nakaharaku,<br>kawasaki, kanagawa 211-8533         |
| 277          | Shinozuka Hospital IRB<br>105-1 Shinozuka, Fujioka-city, Gunma 375-0017                                                     |
| 281          | Kashiwado Hospital IRB<br>2-21-8 Nagazu, Chuo-ku, Chiba-shi, Chiba 260-8656                                                 |

090177e184835a0b\Approved\Approved On: 07-Sep-2013 01:35



3133K1-3000-WW/US (B2521001)

| Site Number   | Name and Address of Committee                                                                                                                                                       |
|---------------|-------------------------------------------------------------------------------------------------------------------------------------------------------------------------------------|
| <b>Japan</b>  |                                                                                                                                                                                     |
| 308           | Himorogi Psychiatric Institute IRB<br>1-20-10 SugamoToshima-ku, Tokyo 170-0002                                                                                                      |
| 309           | Kobe City Hospital Organization Kobe City Medical Center<br>West Hospital IRB<br>2-4 Ichiban-cho, Ngata-ku, kobe city, Hyogo 653-0013                                               |
| <b>Korea</b>  |                                                                                                                                                                                     |
| 472           | Seoul National University Bundang Hospital IRB<br>166 gumi-ro, Bundang-gu,<br>Seongnam-si, Gyeonggi-do 463-707                                                                      |
| 474           | Institutional Review Board for Human Research, Konkuk<br>University Medical Center<br>4-12, Hwayang-dong, Gwangjin-gu Seoul 143-729                                                 |
| <b>Mexico</b> |                                                                                                                                                                                     |
| 154           | Comite de Etica, Investigacion y Bioseguridad Privada de<br>Aguascalientes, SC<br>Sierra Fria 218<br>Fraccionamiento Bosques del Prado NorteAguascalientes,<br>Aguascalientes 20127 |
| 283           | Hospital y Clinical OCA<br>Pino Suarez 640 Nte. Colonia Centro<br>Monterrey, Nuevo Leon 64000                                                                                       |

090177e184835a0b\Approved\Approved On: 07-Sep-2013 01:35



3133K1-3000-WW/US (B2521001)

| <b>Site Number</b> | <b>Name and Address of Committee</b>              |
|--------------------|---------------------------------------------------|
| <b>Netherlands</b> |                                                   |
| 70                 |                                                   |
| 72                 |                                                   |
| 77                 | Vrije Universiteit Medisch Centrum                |
| 80                 | Medisch Ethische Toetsingscommissie               |
| 160                | Postbus 7057                                      |
| 226                | Amsterdam, NH 1007 MB                             |
| 285                |                                                   |
| <b>New Zealand</b> |                                                   |
|                    | Multi Region Ethics Committee                     |
| 54                 | Ministry of Health                                |
| 107                | PO Box 5013                                       |
|                    | Wellington                                        |
| <b>Poland</b>      |                                                   |
| 143                |                                                   |
| 146                | Komisja Bioetyczna przy Warszawskim Uniwersytecie |
| 147                | Medycznym w Warszawie                             |
| 150                | ul. Zwirki i Wigury 61                            |
| 282                | Warszawa 02-091                                   |
| 306                |                                                   |
| <b>Portugal</b>    |                                                   |
| 161                | Comissao de Etica Para a Investigação Clinica     |
| 162                | PARQUE DA SAUDE DE LISBOA.                        |
| 163                | AV. DO BRASIL, 53 PAV. 17-A                       |
|                    | LISBOA, LISBOA 1749-004                           |

090177e184835a0b\Approved\Approved On: 07-Sep-2013 01:35



| Site Number | Name and Address of Committee                                                                                                                                                                                                                                       |
|-------------|---------------------------------------------------------------------------------------------------------------------------------------------------------------------------------------------------------------------------------------------------------------------|
| Russia      |                                                                                                                                                                                                                                                                     |
|             | <p>Local Ethics Committee<br/>GU St-Petersburg scientific-research psychoneurological<br/>institute named after V.M. Bekhterev<br/>of Roszdrav<br/>3 ulitsa Bekhtereva<br/>Saint-Petersburg 192019</p>                                                              |
|             | <p>Ethics Committee Affiliated<br/>with the Federal Services on Surveillance in Healthcare and<br/>Social Development<br/>Building 2, No. 8 Petrovskiy Boulevard<br/>Moscow 127051</p>                                                                              |
| 298         | <p>State Institution St-Petersburg scientific research<br/>psychoneurological V.M. Bekhterev of Roszdrav<br/>3, Bekhtereva ul<br/>Saint Petersburg 192019</p>                                                                                                       |
|             | <p>Ethical council under responsibility of department of state<br/>regulation of circulation of medicines<br/>Ministry of public health and social development of Russian<br/>federation<br/>3, Rakhmanovkiy per. City service post office<br/>4 Moscow, 127994</p> |
|             | <p>Ethics Council at the Ministry of Healthcare of Russian<br/>Federation<br/>3, Rakhmanovskij per<br/>Moscow 127994.</p>                                                                                                                                           |



3133K1-3000-WW/US (B2521001)

| Site Number | Name and Address of Committee                                                                                                                                                                           |
|-------------|---------------------------------------------------------------------------------------------------------------------------------------------------------------------------------------------------------|
|             | <b>Russia</b>                                                                                                                                                                                           |
| 300         | Local Ethics Committee at Scientific Research Medical Complex Vashe Zdorovie<br>7 ulitsa Zinina<br>Kazan 420097                                                                                         |
|             | Ethics Council at the Ministry of Healthcare of Russian Federation<br>3, Rakhmanovskij per.<br>Moscow 127994                                                                                            |
|             | Local Ethics Committee<br>GU St-Petersburg scientific-research psychoneurological institute named after V.M. Bekhterev of Roszdrav<br>3 ulitsa Bekhtereva<br>Saint-Petersburg 192019                    |
| 301         | Ethics Committee Affiliated<br>Ethics Committee Affiliated with the Federal Services on Surveillance<br>in Healthcare and Social Development<br>Building 2, No. 8 Petrovskiy Boulevard<br>Moscow 127051 |
|             | Ethics Council at the Ministry of Healthcare of Russian Federation<br>3, Rakhmanovskij per.<br>Moscow 127994                                                                                            |

090177e184835a0b\Approved\Approved On: 07-Sep-2013 01:35



| Site Number   | Name and Address of Committee                                                                                                                                                                           |
|---------------|---------------------------------------------------------------------------------------------------------------------------------------------------------------------------------------------------------|
| <b>Russia</b> |                                                                                                                                                                                                         |
|               | Local Ethics Committee at Military medical academy n.a. S.M. Kirov<br>6 ulitsa Akademika Lebedeva<br>Saint-Petersburg 194044                                                                            |
|               | LEC Mailitary medical academy n.a. S.M. Kirov of Ministry of Defense of Russia<br>6, akad Lebedeva ulSt Petersburg 194044                                                                               |
| 302           | Ethics Council at the Ministry of Healthcare of Russian Federation<br>3, Rakhmanovskij per.<br>Moscow 127994                                                                                            |
|               | Ethics Committee Affiliated<br>Ethics Committee Affiliated with the Federal Services on Surveillance<br>in Healthcare and Social Development<br>Building 2, No. 8 Petrovskiy Boulevard<br>Moscow 127051 |





---

| <b>Site Number</b> | <b>Name and Address of Committee</b>                                                                                                                                                                       |
|--------------------|------------------------------------------------------------------------------------------------------------------------------------------------------------------------------------------------------------|
|                    | <b>Russia</b>                                                                                                                                                                                              |
|                    | Local Ethics Committee at City geriatric medical social center<br>148 nab reki Fontanki<br>Saint-Petersburg 190103                                                                                         |
|                    | GUZ Cite Geriatric medical-social center<br>148, Fontanka emb<br>St Petersburg 198103                                                                                                                      |
| 303                | Ethics Committee Affiliated<br>Ethics Committee Affiliated with the Federal Services on<br>Surveillance<br>in Healthcare and Social Development<br>Building 2, No. 8 Petrovskiy Boulevard<br>Moscow 127051 |
|                    | Ethics Council at the Ministry of Healthcare of Russian<br>Federation<br>3, Rakhmanovskij per.<br>Moscow 127994                                                                                            |

---



3133K1-3000-WW/US (B2521001)

| Site Number   | Name and Address of Committee                                                                                                                                                                           |
|---------------|---------------------------------------------------------------------------------------------------------------------------------------------------------------------------------------------------------|
| <b>Russia</b> |                                                                                                                                                                                                         |
|               | Local Ethics Committee at Nizhny Novgorod regional clinical hospital n.a. N.A.Semashko<br>190 ulitsa Rodionova<br>Nizhny Novgorod 603126                                                                |
| 304           | Ethics Council at the Ministry of Healthcare of Russian Federation<br>3, Rakhmanovskij per.<br>Moscow 127994                                                                                            |
|               | Ethics Committee Affiliated<br>Ethics Committee Affiliated with the Federal Services on Surveillance<br>in Healthcare and Social Development<br>Building 2, No. 8 Petrovskiy Boulevard<br>Moscow 127051 |
| <b>Serbia</b> |                                                                                                                                                                                                         |
| 42            | Ethics Committee of CCS<br>Pasterova 2<br>Belgrade 11000                                                                                                                                                |
| 44            | Ethics Committee of CC Kragujevac<br>Zmaj Jovina 32<br>Kragujevac, Serbia 34000                                                                                                                         |
| 266           | Ethics Committee<br>Clinical Centre of Vojvodina<br>Hajduk Veljkova 1-9<br>Novi Sad 21000                                                                                                               |

090177e184835a0b\Approved\Approved On: 07-Sep-2013 01:35

| Site Number     | Name and Address of Committee                                                                                                                                                                   |
|-----------------|-------------------------------------------------------------------------------------------------------------------------------------------------------------------------------------------------|
| <b>Slovakia</b> |                                                                                                                                                                                                 |
| 135             | Eticka komisia Vseobecnej nemocnice Rimavska Sobota<br>Srobarova 1<br>Rimavska Sobota 979 12                                                                                                    |
| 136             | Eticka komisia Vseobecnej nemocnice Rimavska Sobota<br>Srobarova 1<br>Rimavska Sobota 979 12<br>Slovakia                                                                                        |
| 310             | Eticka komisia UN Bratislava<br>Nemocnica Ruzinov<br>Ruzinovska 6<br>Bratislava 826 06                                                                                                          |
| 137             | Eticka komisia Vseobecnej nemocnice Rimavska Sobota<br>Srobarova 1<br>Rimavska Sobota 979 12<br><br>Eticka komisia<br>Psychiatricka nemocnica Michalovce, n.o.<br>Stranany<br>Michalovce 071 01 |
| 138             | Eticka komisia Bratislavskeho samospravneho kraja<br>Sabinovska 16<br>P.O.Box 106<br>Bratislava 820 05                                                                                          |

| <b>Site Number</b>  | <b>Name and Address of Committee</b>                                                                |
|---------------------|-----------------------------------------------------------------------------------------------------|
| <b>Slovakia</b>     |                                                                                                     |
|                     | Eticka komisia Vseobecnej nemocnice Rimavska Sobota<br>Srobarova 1 Rimavska Sobota 979 12           |
| 311                 | Eticka komisia<br>Univerzitna nemocnica Martin<br>Kollarova 2<br>Martin, Slovakia 036 59            |
|                     | Eticka komisia Vseobecnej nemocnice Rimavska Sobota<br>Srobarova 1 Rimavska Sobota 979 12           |
| 313                 | Eticka komisia UN Bratislava a LF UK<br>Nemocnica Stare Mesto<br>Mickiewiczova 13 Bratislava 813 69 |
|                     | Eticka komisia Vseobecnej nemocnice Rimavska Sobota<br>Srobarova 1 Rimavska Sobota 979 12           |
| 314                 | Eticka komisia<br>Fakultna nemocnica s poliklinikou Zilina<br>Vojtecha Spanyola 43<br>Zilina 012 07 |
| <b>South Africa</b> |                                                                                                     |
| 83                  | Pharma Ethics                                                                                       |
| 84                  | 123 Amcor Road                                                                                      |
| 86                  | Lyttelton Manor,                                                                                    |
| 89                  | Centurion 0157                                                                                      |

| Site Number  | Name and Address of Committee                                                                                                                                                                                                                                                                                                                                                            |
|--------------|------------------------------------------------------------------------------------------------------------------------------------------------------------------------------------------------------------------------------------------------------------------------------------------------------------------------------------------------------------------------------------------|
| <b>Spain</b> |                                                                                                                                                                                                                                                                                                                                                                                          |
| 88           | Pharma Ethics (Pty) Ltd<br>Lyttleton Manor<br>123 Amcor Road<br>Pretoria 0157                                                                                                                                                                                                                                                                                                            |
| 14           | Hospital Clinic i Provincial de Barcelona<br>Comite Etico de Investigacion Clinica<br>Villarroel, 170<br>Barcelona, Barcelona 08036<br><br>COMITE ETICO DE INVESTIGACION CLINICA Parc de Salut MAR, COMITE ETICO DE INVESTIGACION CLINICA, EDIFICIO PRBB<br>C/ DOCTOR AIGUADER, N° 88<br>BARCELONA, BARCELONA 08003                                                                      |
| 15           | COMITE ETICO DE INVESTIGACION CLINICA Parc de Salut MAR<br>COMITE ETICO DE INVESTIGACION CLINICA<br>EDIFICIO PRBB<br>C/ DOCTOR AIGUADER, N° 88<br>BARCELONA, BARCELONA 08003<br><br>CEIC Parc de Salut Mar<br>Comite Etico de Investigacion Clinica<br>Secretaria Tecnica. Parc de Recerca Biomedica de Barcelona (Dcho. 163.03)<br>C/ Doctor Aiguader, 88<br>Barcelona, Barcelona 08003 |



| Site Number  | Name and Address of Committee                                                                                                                                                |
|--------------|------------------------------------------------------------------------------------------------------------------------------------------------------------------------------|
| <b>Spain</b> |                                                                                                                                                                              |
|              | Hospital de la Santa Creu i Sant Pau<br>COMITE ETICO DE INVESTIGACION CLINICA<br>AVDA. SANT ANTONI MARIA CLARET, 167<br>BARCELONA, BARCELONA 08025                           |
| 16           | COMITE ETICO DE INVESTIGACION CLINICA Parc de Salut MAR<br>COMITE ETICO DE INVESTIGACION CLINICA<br>EDIFICIO PRBB<br>C/ DOCTOR AIGUADER, Nº 88<br>BARCELONA, BARCELONA 08003 |
|              | Hospital Mutua de Terrassa<br>Comite Etico de Investigacion Clinica<br>Pl. Dr. Robert, 5<br>Terrassa, Barcelona 08221                                                        |
| 18           | COMITE ETICO DE INVESTIGACION CLINICA Parc de Salut MAR<br>COMITE ETICO DE INVESTIGACION CLINICA<br>EDIFICIO PRBB<br>C/ DOCTOR AIGUADER, Nº 88<br>BARCELONA, BARCELONA 08003 |



| Site Number  | Name and Address of Committee                                                                                                                                                                                                                                    |
|--------------|------------------------------------------------------------------------------------------------------------------------------------------------------------------------------------------------------------------------------------------------------------------|
| <b>Spain</b> |                                                                                                                                                                                                                                                                  |
|              | Hospital Universitario La Paz<br>Comite Etico de Investigacion Clinica<br>Hospital General Planta 8 <sup>a</sup><br>Paseo de la Castellana, 261<br>Madrid, Madrid 28046                                                                                          |
| 19           | COMITE ETICO DE INVESTIGACION CLINICA Parc de Salut MAR<br>COMITE ETICO DE INVESTIGACION CLINICA<br>EDIFICIO PRBB<br>C/ DOCTOR AIGUADER, N° 88<br>BARCELONA, BARCELONA 08003                                                                                     |
| 20           | COMITE ETICO DE INVESTIGACION CLINICA Parc de Salut MAR<br>COMITE ETICO DE INVESTIGACION CLINICA<br>EDIFICIO PRBB, C/ DOCTOR AIGUADER, N° 88<br>BARCELONA, BARCELONA 08003<br><br>CEIC DE BURGOS Y SORIA, Hospital General Yague<br>Avda del Cid, 96BURGOS 09005 |



| Site Number  | Name and Address of Committee                                                                                                                                                                                                                                      |
|--------------|--------------------------------------------------------------------------------------------------------------------------------------------------------------------------------------------------------------------------------------------------------------------|
| <b>Spain</b> |                                                                                                                                                                                                                                                                    |
|              | Hospital 12 de Octubre<br>Instituto de Investigacion Hospital 12 de Octubre (i+12)<br>Area de Gestion de Proyectos - Unidad Administrativa CEIC<br>Centro de Actividades Ambulatorias, Bloque D - Planta 6 <sup>a</sup><br>Avda de Cordoba s/nMadrid, Madrid 28041 |
| 21           | COMITE ETICO DE INVESTIGACION CLINICA Parc de Salut MAR<br>COMITE ETICO DE INVESTIGACION CLINICA<br>EDIFICIO PRBB<br>C/ DOCTOR AIGUADER, N° 88<br>BARCELONA, BARCELONA 08003                                                                                       |
|              | Hospital de Cruces<br>Comite Etico de Investigacion Clinica<br>Plaza de Cruces, s/n<br>Barakaldo, Vizcaya 48903                                                                                                                                                    |
| 22           | COMITE ETICO DE INVESTIGACION CLINICA Parc de Salut MAR<br>COMITE ETICO DE INVESTIGACION CLINICA<br>EDIFICIO PRBB<br>C/ DOCTOR AIGUADER, N° 88<br>BARCELONA, BARCELONA 08003                                                                                       |





| Site Number  | Name and Address of Committee                                                                                                                                                        |
|--------------|--------------------------------------------------------------------------------------------------------------------------------------------------------------------------------------|
| <b>Spain</b> |                                                                                                                                                                                      |
|              | Hospital Clinico San Carlos<br>Comite Etico de Investigacion Clinica<br>Ciudad Universitaria. Planta 1ª - Ala Norte - Puerta G<br>C/ Doctor Martin Lagos s/n<br>Madrid, Madrid 28040 |
| 23           | COMITE ETICO DE INVESTIGACION CLINICA Parc de Salut MAR<br>COMITE ETICO DE INVESTIGACION CLINICA<br>EDIFICIO PRBB<br>C/ DOCTOR AIGUADER, Nº 88<br>BARCELONA, BARCELONA 08003         |
|              | Hospital Universitario de la Princesa<br>Comite Etico de Investigacion Clinica<br>C/ Diego de Leon 62<br>Madrid 28006                                                                |
| 24           | COMITE ETICO DE INVESTIGACION CLINICA Parc de Salut MAR<br>COMITE ETICO DE INVESTIGACION CLINICA<br>EDIFICIO PRBB<br>C/ DOCTOR AIGUADER, Nº 88<br>BARCELONA, BARCELONA 08003         |



3133K1-3000-WW/US (B2521001)

| Site Number  | Name and Address of Committee                                                                                                                                                |
|--------------|------------------------------------------------------------------------------------------------------------------------------------------------------------------------------|
| <b>Spain</b> |                                                                                                                                                                              |
|              | Hospital General de Elche<br>Comite Etico de Investigacion Clinica<br>Cami de l'Almazara, 11<br>Elche, Alicante 03203                                                        |
| 25           | COMITE ETICO DE INVESTIGACION CLINICA Parc de Salut MAR<br>COMITE ETICO DE INVESTIGACION CLINICA<br>EDIFICIO PRBB<br>C/ DOCTOR AIGUADER, N° 88<br>BARCELONA, BARCELONA 08003 |
| 26           | COMITE ETICO DE INVESTIGACION CLINICA Parc de Salut MAR<br>COMITE ETICO DE INVESTIGACION CLINICA<br>EDIFICIO PRBB<br>C/ DOCTOR AIGUADER, N° 88<br>BARCELONA, BARCELONA 08003 |

090177e184835a0b\Approved\Approved On: 07-Sep-2013 01:35

| Site Number  | Name and Address of Committee                                                                                                                                                          |
|--------------|----------------------------------------------------------------------------------------------------------------------------------------------------------------------------------------|
| <b>Spain</b> |                                                                                                                                                                                        |
|              | Complejo Hospitalario de Caceres<br>Comite Etico de Investigacion Clinica<br>Avda. Pablo Naranjo, s/n<br>Caceres, Caceres 10003                                                        |
| 51           | COMITE ETICO DE INVESTIGACION CLINICA Parc de Salut MAR<br>COMITE ETICO DE INVESTIGACION CLINICA<br>EDIFICIO PRBB<br>C/ DOCTOR AIGUADER, Nº 88<br>BARCELONA, BARCELONA 08003           |
|              | Hospital Universitario Ramon y Cajal<br>Comite Etico de Investigacion Clinica<br>Secretaria del Comite - Planta 2ª Dcha.<br>Ctra. de Colmenar Viejo, Km. 9.100<br>Madrid, Madrid 28034 |
| 212          | COMITE ETICO DE INVESTIGACION CLINICA Parc de Salut MAR<br>COMITE ETICO DE INVESTIGACION CLINICA<br>EDIFICIO PRBB<br>C/ DOCTOR AIGUADER, Nº 88<br>BARCELONA, BARCELONA 08003           |



3133K1-3000-WW/US (B2521001)

| Site Number        | Name and Address of Committee                                                                                                                                                |
|--------------------|------------------------------------------------------------------------------------------------------------------------------------------------------------------------------|
| <b>Spain</b>       |                                                                                                                                                                              |
| 214                | COMITE ETICO DE INVESTIGACION CLINICA Parc de Salut MAR<br>COMITE ETICO DE INVESTIGACION CLINICA<br>EDIFICIO PRBB<br>C/ DOCTOR AIGUADER, N° 88<br>BARCELONA, BARCELONA 08003 |
|                    | Comite Etico de Investigacion Clinica de Las Islas Baleares<br>Conselleria de Salut i Consum<br>Camino de Jesus, 38<br>Palma de Mallorca, Islas Baleares 07011               |
| <b>Sweden</b>      |                                                                                                                                                                              |
| 005                | Regionala etikprovningssamnden i Stockholm<br>FE 289                                                                                                                         |
| 215                | Stockholm 171 77                                                                                                                                                             |
| <b>Switzerland</b> |                                                                                                                                                                              |
| 127                | Ethikkommission beider Basel EKBB<br>Hebelstrasse 53 Basel CH-4056                                                                                                           |
| 128                | University Hospital Geneva<br>Ethic Committee of Internal Medicine<br>Geneva 1211                                                                                            |
| 164                | Commission d'Ethique de la Recherche Clinique de la faculte de Biologie et Medecine<br>Faculte de Biologie et de Medecine<br>Decanat Rue du Bugnon 21 Lausanne 1005          |

090177e184835a0b\Approved\Approved On: 07-Sep-2013 01:35



---

| <b>Site Number</b>    | <b>Name and Address of Committee</b>                                                                                                |
|-----------------------|-------------------------------------------------------------------------------------------------------------------------------------|
| <b>United Kingdom</b> |                                                                                                                                     |
|                       | NRES Committee London-South East<br>South East Coast Strategic Health Authority<br>Preston Hall<br>Aylesford, Kent ME20 7NJ         |
|                       | Sheffield Health and Social Care NHS<br>Research Development Unit<br>Fulwood House<br>Old Fulwood Road<br>Sheffield S10 3TH         |
| 60                    | NRES Committee London South East<br>Room 4W/10, 4th Floor West<br>Charing Cross Hospital<br>Fulham Palace Road<br>London, UK W6 8RF |
|                       | STH NHS Foundation Trust Research Department<br>1st Floor<br>11 Broomfield Road<br>Sheffield S10 2SE                                |

---



---

| <b>Site Number</b>                | <b>Name and Address of Committee</b>                                                                                                                                                                                 |
|-----------------------------------|----------------------------------------------------------------------------------------------------------------------------------------------------------------------------------------------------------------------|
| <hr/> <b>United Kingdom</b> <hr/> |                                                                                                                                                                                                                      |
|                                   | NRES Committee London South East<br>Room 4W/10, 4th Floor West<br>Charing Cross Hospital<br>Fulham Palace Road<br>London, UK W6 8RF                                                                                  |
| 61                                | NRES Committee London-South East<br>South East Coast Strategic Health Authority<br>Preston Hall<br>Aylesford, Kent ME20 7NJ                                                                                          |
|                                   | Cardiff and Vale University Health Board<br>University Hospital of Wales<br>Commercial Clinical Trials, Research & Development Office<br>Second Floor, Tower Block 2, Room 3 (2TB2 R3)<br>Heath ParkCardiff CF14 4XW |

---



3133K1-3000-WW/US (B2521001)

---

| <b>Site Number</b> | <b>Name and Address of Committee</b>                                                                                                                                                                                          |
|--------------------|-------------------------------------------------------------------------------------------------------------------------------------------------------------------------------------------------------------------------------|
|                    | <b>United Kingdom</b>                                                                                                                                                                                                         |
|                    | NRES Committee London South East<br>Room 4W/10, 4th Floor West<br>Charing Cross Hospital, Fulham Palace Road<br>London, UK W6 8RF                                                                                             |
| 62                 | NRES Committee London-South East<br>South East Coast Strategic Health Authority<br>Preston Hall<br>Aylesford, Kent ME20 7NJ                                                                                                   |
|                    | Research & Development Directorate, Brighton & Sussex<br>University Hospitals NHS Trust, Clinical Investigator &<br>Research Unit, Royal Sussex County Hospital, Level 5<br>Thomas Kemp Tower<br>Eastern Road Brighton BN25BE |

---

090177e184835a0b\Approved\Approved On: 07-Sep-2013 01:35







| Site Number | Name and Address of Committee                                                                                                                                                                                                 |
|-------------|-------------------------------------------------------------------------------------------------------------------------------------------------------------------------------------------------------------------------------|
|             | <b>United Kingdom</b>                                                                                                                                                                                                         |
|             | NRES Committee London South East<br>Room 4W/10, 4th Floor West<br>Charing Cross Hospital<br>Fulham Palace Road<br>London, UK W6 8RF                                                                                           |
| 66          | NRES Committee London-South East<br>South East Coast Strategic Health Authority<br>Preston Hall<br>Aylesford, Kent ME20 7NJ                                                                                                   |
|             | NHS Greater Glasgow and Community Primary Care,<br>Community & Mental Health LREC<br>South Glasgow & Clyde REC<br>R&D Directorate, 1st Floor - The Tennent Institute<br>Western Infirmary<br>38 Church Street Glasgow G11 6NT |
| 67          | NRES Committee London South East<br>Room 4W/10, 4th Floor West<br>Charing Cross Hospital<br>Fulham Palace Road<br>London, UK W6 8RF                                                                                           |
| 68          | NRES Committee London-South East<br>South East Coast Strategic Health Authority<br>Preston Hall Aylesford, Kent ME20 7NJ                                                                                                      |



3133K1-3000-WW/US (B2521001)

---

| <b>Site Number</b> | <b>Name and Address of Committee</b>                                                                                                |
|--------------------|-------------------------------------------------------------------------------------------------------------------------------------|
|                    | <b>United Kingdom</b>                                                                                                               |
|                    | NRES Committee London South East<br>Room 4W/10, 4th Floor West<br>Charing Cross Hospital<br>Fulham Palace Road<br>London, UK W6 8RF |
| 159                | NRES Committee London-South East<br>South East Coast Strategic Health Authority<br>Preston Hall<br>Aylesford, Kent ME20 7NJ         |
|                    | Kings Health Partners<br>Joint Clinical Trials Office<br>Floor 16, Tower Wing<br>Guy's Hospital<br>Great Maze Pond London SE1 9RT   |

---

090177e184835a0b\Approved\Approved On: 07-Sep-2013 01:35



3133K1-3000-WW/US (B2521001)

---

| <b>Site Number</b>                | <b>Name and Address of Committee</b>                                                                                                                                                                                  |
|-----------------------------------|-----------------------------------------------------------------------------------------------------------------------------------------------------------------------------------------------------------------------|
| <hr/> <b>United Kingdom</b> <hr/> |                                                                                                                                                                                                                       |
|                                   | NRES Committee London South East<br>Room 4W/10, 4th Floor West, Charing Cross Hospital<br>Fulham Palace Road, London, UK W6 8RF                                                                                       |
| 166                               | NRES Committee London-South East<br>South East Coast Strategic Health Authority, Preston Hall,<br>Aylesford, Kent ME20 7NJ                                                                                            |
|                                   | Imperial College London and Imperial College Healthcare<br>NHS Trust, AHSC Joint Research Office, Room GM14<br>St. Mary 's Hospital, Faculty of Medicine<br>Ground Mezzanine Floor<br>Praed Street Wing London W2 1PG |

---

090177e184835a0b\Approved\Approved On: 07-Sep-2013 01:35



---

| <b>Site Number</b>    | <b>Name and Address of Committee</b>                                                                                                           |
|-----------------------|------------------------------------------------------------------------------------------------------------------------------------------------|
| <b>United Kingdom</b> |                                                                                                                                                |
|                       | The Newcastle upon Tyne Hospitals NHS Foundation Trust<br>Royal Victoria Infirmary<br>Queen Victoria Road<br>Newcastle upon Tyne NE1 4LP       |
|                       | NRES Committee London South East<br>Room 4W/10, 4th Floor West<br>Charing Cross Hospital<br>Fulham Palace Road<br>London, UK W6 8RF            |
| 168                   | Northumberland, Tyne and Wear NHS Trust<br>Research Department<br>St Nicholas Hospital<br>Jubilee Road<br>Gosforth Newcastle upon Tyne NE3 3XT |
|                       | NRES Committee London-South East<br>South East Coast Strategic Health Authority<br>Preston Hall<br>Aylesford, Kent ME20 7NJ                    |

---



3133K1-3000-WW/US (B2521001)

---

| <b>Site Number</b> | <b>Name and Address of Committee</b>        |
|--------------------|---------------------------------------------|
|                    | <b>United Kingdom</b>                       |
|                    | South East Research Ethics Committee        |
|                    | South East Coast Strategic Health Authority |
|                    | Preston Hall                                |
|                    | Aylesford, Kent ME20 7NJ                    |
| 175                | Northampton General Hospital NHS Trust      |
|                    | Research & Development Centre               |
|                    | Cliftonville, Northampton NN1 5BD           |
|                    | NRES Committee London South East            |
|                    | Room 4W/10, 4th Floor West                  |
|                    | Charing Cross Hospital                      |
|                    | Fulham Palace Road, London, UK W6 8RF       |

---

090177e184835a0b\Approved\Approved On: 07-Sep-2013 01:35

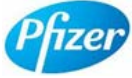

---

| Site Number          | Name and Address of Committee      |
|----------------------|------------------------------------|
| <b>United States</b> |                                    |
| 216                  |                                    |
| 217                  |                                    |
| 218                  |                                    |
| 219                  |                                    |
| 220                  |                                    |
| 221                  |                                    |
| 223                  |                                    |
| 224                  |                                    |
| 227                  |                                    |
| 228                  |                                    |
| 229                  |                                    |
| 230                  | Western Institutional Review Board |
| 235                  | 3535 Seventh Avenue Southwest      |
| 236                  | Olympia, WA 98502-5010             |
| 238                  |                                    |
| 239                  |                                    |
| 241                  |                                    |
| 242                  |                                    |
| 243                  |                                    |
| 247                  |                                    |
| 250                  |                                    |
| 251                  |                                    |
| 252                  |                                    |
| 253                  |                                    |
| 254                  |                                    |

---

090177e184835a0b\Approved\Approved On: 07-Sep-2013 01:35



3133K1-3000-WW/US (B2521001)

---

| Site Number          | Name and Address of Committee      |
|----------------------|------------------------------------|
| <b>United States</b> |                                    |
| 255                  |                                    |
| 256                  |                                    |
| 258                  |                                    |
| 260                  |                                    |
| 269                  |                                    |
| 279                  |                                    |
| 280                  |                                    |
| 286                  |                                    |
| 288                  |                                    |
| 289                  |                                    |
| 317                  |                                    |
| 318                  | Western Institutional Review Board |
| 319                  | 3535 Seventh Avenue Southwest      |
| 320                  | Olympia, WA 98502-5010             |
| 322                  |                                    |
| 325                  |                                    |
| 326                  |                                    |
| 327                  |                                    |
| 332                  |                                    |
| 333                  |                                    |
| 334                  |                                    |
| 357                  |                                    |
| 359                  |                                    |
| 363                  |                                    |
| 370                  |                                    |

---

090177e184835a0b\Approved\Approved On: 07-Sep-2013 01:35



---

| Site Number          | Name and Address of Committee      |
|----------------------|------------------------------------|
| <b>United States</b> |                                    |
| 372                  |                                    |
| 396                  |                                    |
| 397                  |                                    |
| 398                  |                                    |
| 400                  |                                    |
| 402                  |                                    |
| 406                  |                                    |
| 407                  |                                    |
| 409                  |                                    |
| 413                  |                                    |
| 414                  | Western Institutional Review Board |
| 416                  | 3535 Seventh Avenue Southwest      |
| 417                  | Olympia, WA 98502-5010             |
| 418                  |                                    |
| 421                  |                                    |
| 423                  |                                    |
| 432                  |                                    |
| 433                  |                                    |
| 434                  |                                    |
| 445                  |                                    |
| 450                  |                                    |
| 463                  |                                    |
| 465                  |                                    |
| 468                  | Western Institutional Review Board |
| 469                  | 3535 Seventh Avenue Southwest      |
|                      | Olympia, WA 98502-5010             |

---

090177e184835a0b\Approved\Approved On: 07-Sep-2013 01:35





3133K1-3000-WW/US (B2521001)

| <b>Site Number</b>   | <b>Name and Address of Committee</b>                                                                                                                                   |
|----------------------|------------------------------------------------------------------------------------------------------------------------------------------------------------------------|
| <b>United States</b> |                                                                                                                                                                        |
| 240                  | Springfield Committee for Research Involving Human Subjects<br>P.O. Box 19616<br>801 North Rutledge<br>Springfield, IL 62794-9616                                      |
| 244                  | Greenwich Hospital Institutional Review Board<br>Greenwich Hospital<br>5 Perryridge Road<br>Greenwich, CT 06830                                                        |
| 245                  | Abington Memorial Hospital IRB<br>1200 Old York Road<br>Abington, PA 19001                                                                                             |
| 246                  | Providence Health & Services Institutional Review Board<br>Building A<br>5251 NE Glisan Street<br>3rd Floor Portland, OR 97213                                         |
| 257                  | Institutional Review Board for Health Sciences Research<br>University of Virginia Health Sciences Center<br>Suite 400<br>One Morton Drive<br>Charlottesville, VA 22903 |
| 259                  | Human Investigation Committee<br>Yale University School of Medicine<br>53-55 College Street<br>New Haven, CT 06520                                                     |

090177e184835a0b\Approved\Approved On: 07-Sep-2013 01:35



3133K1-3000-WW/US (B2521001)

| Site Number          | Name and Address of Committee                                                                                                                                                         |
|----------------------|---------------------------------------------------------------------------------------------------------------------------------------------------------------------------------------|
| <b>United States</b> |                                                                                                                                                                                       |
| 261                  | Michigan State University<br>Biomedical and Health IRB<br>207 Olds Hall<br>East Lansing, MI 48824                                                                                     |
| 262                  | University of Michigan Medical School Institutional Review Board (IRBMED)<br>Room 2086<br>2800 Plymouth Road<br>Building 200Ann Arbor, MI 48109-2800                                  |
| 264                  | Medical University of South Carolina Institutional Review Board for Human Research<br>Office of Research Integrity<br>Suite 601 - MSC 857<br>19 Hagood Avenue<br>Charleston, SC 29425 |
| 268                  | University of Pennsylvania Office of Regulatory Affairs<br>Suite 301S<br>3624 Market Street<br>Philadelphia, PA 19104                                                                 |
| 271                  | Butler Hospital Institutional Review Board<br>345 Blackstone Boulevard<br>Providence, RI 02906                                                                                        |

090177e184835a0b\Approved\Approved On: 07-Sep-2013 01:35



3133K1-3000-WW/US (B2521001)

| <b>Site Number</b>   | <b>Name and Address of Committee</b>                                                                                                 |
|----------------------|--------------------------------------------------------------------------------------------------------------------------------------|
| <b>United States</b> |                                                                                                                                      |
| 355                  | Partners Research Committee<br>Suite 1002<br>116 Huntington Avenue<br>Boston, MA 02116                                               |
|                      | PHS Research Management<br>101 Huntington Avenue<br>Boston, MA 02116                                                                 |
| 358                  | University of North Texas Health Science Center at Fort Worth IRB<br>3400 Camp Bowie Blvd<br>Forth Worth, TX 76107                   |
| 365                  | Sharp Institutional Review Board<br>8695 Spectrum Center Boulevard<br>San Diego, CA 92123                                            |
| 412                  | Loma Linda University Adventist Health Sciences Center - Institutional Review Board<br>11188 Anderson Street<br>Loma Linda, CA 92350 |
| 422                  | Broward Health IRB<br>1600 South Andrews Avenue<br>Fort Lauderdale, FL 33316                                                         |

090177e184835a0b\Approved\Approved On: 07-Sep-2013 01:35
